# Supplementary material for: Characteristics of Interval Colorectal Cancer: A Canadian Retrospective Population-Level Analysis from Newfoundland and Labrador
Source: MDPI journal article supplement (doi:10.3390/curroncol29120716), 2022-11-24
Supplement: s1 [file s1]

**Supplemental Table S1.** List of variables analyzed in chart review.

| Variable                                      | Coding                                                                                                                                                                                                                                                                                                                                                                                                                                                                                                |
|-----------------------------------------------|-------------------------------------------------------------------------------------------------------------------------------------------------------------------------------------------------------------------------------------------------------------------------------------------------------------------------------------------------------------------------------------------------------------------------------------------------------------------------------------------------------|
| <b>Demographic Variables</b>                  |                                                                                                                                                                                                                                                                                                                                                                                                                                                                                                       |
| <b>Study ID number</b>                        | numerical                                                                                                                                                                                                                                                                                                                                                                                                                                                                                             |
| <b>Date of Birth (DOB)</b>                    | (YY-MM-DD)                                                                                                                                                                                                                                                                                                                                                                                                                                                                                            |
| <b>Date of Death (DOD)</b>                    | (YY-MM-DD)                                                                                                                                                                                                                                                                                                                                                                                                                                                                                            |
| <b>Gender</b>                                 | 1- Male; 2- Female                                                                                                                                                                                                                                                                                                                                                                                                                                                                                    |
| <b>Date of Procedure (DOP)</b>                | (YY-MM-DD)                                                                                                                                                                                                                                                                                                                                                                                                                                                                                            |
| <b>Indication for Colonoscopy</b>             | 1- Family history of CRC; 2- Personal history of CRC; 3- Family history of polyps; 4- Personal history of polyps; 5- No family history of CRC/polyps cancer screening; 6- known/suspected IBD; 7- Altered bowel habits; 8- Abdominal pain; 9- Not stated 10- Anemia of Chronic disease/Anemia/FOB+; 11- unidentified mass; 12- f/u diverticular disease; 13- acute bleeding; 14- rectal bleeding; 15- IBD Cancer screening; 16- Abnormal colonic imaging; 17- known carrier or a genetic CRC syndrome |
| <b>Colonoscopy Variables</b>                  |                                                                                                                                                                                                                                                                                                                                                                                                                                                                                                       |
| <b>Location</b>                               | Health regions (categorical)                                                                                                                                                                                                                                                                                                                                                                                                                                                                          |
| <b>Did a trainee participate</b>              | 1- Yes; 2- No; 9- Not stated                                                                                                                                                                                                                                                                                                                                                                                                                                                                          |
| <b>Endoscopist specialty</b>                  | 1- Gastroenterologist; 2- Internist; 3- Surgeon; 4- Family doctor; 9- Not stated                                                                                                                                                                                                                                                                                                                                                                                                                      |
| <b>Was colonoscopy complete</b>               | 1- Yes; 2- No; 9- Not stated                                                                                                                                                                                                                                                                                                                                                                                                                                                                          |
| <b>How was completeness documented</b>        | 1- Landmark description; 2- Intubation of ileum; 3- Photograph; 4- Biopsy of ileum; 5- Not complete; 9- Not documented                                                                                                                                                                                                                                                                                                                                                                                |
| <b>If incomplete, what was the reason</b>     | 1- Redundancy; 2- Obstruction; 3- Patient discomfort; 4- Complication; 5- Poor preparation; 6- Diverticulosis; 7- Not applicable (was complete) 9- Not stated                                                                                                                                                                                                                                                                                                                                         |
| <b>Maximal insertion</b>                      | 1- Cecal intubation; 2- Incomplete; 3- Flexible sigmoidoscopy; 9- Not stated                                                                                                                                                                                                                                                                                                                                                                                                                          |
| <b>Documentation of rectal retroflexion</b>   | 1- Yes; 2- No                                                                                                                                                                                                                                                                                                                                                                                                                                                                                         |
| <b>Withdrawal time recorded</b>               | 1- Yes; 2- No                                                                                                                                                                                                                                                                                                                                                                                                                                                                                         |
| <b>Withdrawal time in minutes and seconds</b> | numerical                                                                                                                                                                                                                                                                                                                                                                                                                                                                                             |
| <b>Adverse events</b>                         | 1- Yes; 2- No; 9- Not stated                                                                                                                                                                                                                                                                                                                                                                                                                                                                          |
| <b>Bowel prep type</b>                        | 1- Pico Salax; 2- Purgodan; 3- Peglyte; 4- Golytely; 5- Bipeglyte; 6- fleet enema 7- picosalax, bisacodyl/ducolax 8- bisacodyl/ducolax ; 9- Not stated                                                                                                                                                                                                                                                                                                                                                |

|                                             |                                                                                                                                                                                                                                                                                                                                         |
|---------------------------------------------|-----------------------------------------------------------------------------------------------------------------------------------------------------------------------------------------------------------------------------------------------------------------------------------------------------------------------------------------|
| <b>Bowel prep quality</b>                   | 1- Excellent/Very good; 2- Good; 3- Fair/Poor; 4- Very poor/Bad; 9- Not stated                                                                                                                                                                                                                                                          |
| <b>Findings (excluding polyps)</b>          | 1- Normal; 2- IBD (active or in remission); 3- other benign (diverticulosis, angiodysplasia); 4- Colonoscopy not performed/started; 5- Normal but incomplete; 6- Perforation; 7- bleeding 9- Not stated 10- none                                                                                                                        |
| <b>Sedation used</b>                        | 1- Yes; 2- No; 9- Not stated                                                                                                                                                                                                                                                                                                            |
| <b>Sedation agent</b>                       | 1- Propofol; 2- Versed; 3- Fentanyl; 4- Valium; 5- Demerol; 6- Demerol, valium, 7- fentanyl, Versed; 8 Versed, Demerol; 9- other; 10- Not stated; 11- none                                                                                                                                                                              |
| <b>Was antispasmodic used</b>               | 1- Yes; 2- N-o; 9 Not stated                                                                                                                                                                                                                                                                                                            |
| <b>Polyp Variables at Index Colonoscopy</b> |                                                                                                                                                                                                                                                                                                                                         |
| <b>Was a polyp identified</b>               | 1- Yes; 2- No; 3- biopsied; 9- Not stated                                                                                                                                                                                                                                                                                               |
| <b>Was a polyp removed</b>                  | 1- Yes; 2- No; 9- Not stated                                                                                                                                                                                                                                                                                                            |
| <b>Total number of polyps identified</b>    | numerical, 99- multiple                                                                                                                                                                                                                                                                                                                 |
| <b>Total number of polyps removed</b>       | numerical, 99-multiple                                                                                                                                                                                                                                                                                                                  |
| <b>Largest polyp size (mm)</b>              | numerical (blank is not stated)                                                                                                                                                                                                                                                                                                         |
| <b>Polyp morphology</b>                     | 1- Pedunculated; 2- Sessile; 3- Flat; 4- Umbilicated/ulcerated; 5- No polyp; 9- Not stated                                                                                                                                                                                                                                              |
| <b>Polyp histology</b>                      | 1- No polyp; 2- Adenoma; 3- Hyperplastic; 4- Inflammatory; 5- Lymphoid; 6- Normal; 7- Not determined (polyp not retrieved); 8- Malignant; 9- Leiomyoma; 10- polyp not removed; 11- Serrated (SSA/P); 12- Serrated with dysplasia; 13- Traditional serrated adenoma (TSA); 14- ganglioneuroma                                            |
| <b>Polyp location (largest polyp)</b>       | 1- Cecum; 2- Ascending; 3- Hepatic flexure; 4- Transverse; 5- Splenic flexure; 6- Descending colon; 7- Sigmoid; 8- Rectum; 9- Not stated; 10- Pan colon; 11- Right colon; 12- Left colon; 13- no polyps                                                                                                                                 |
| <b>Polypectomy Technique</b>                | 1- Snare/excision with cautery; 2- Snare/excision without cautery; 3- Cold/excisional biopsy; 4- Snare and hot excisional biopsy 5- Hot biopsy/fulguration; 6- Endoscopic mucosal resection (if any injection of fluid to create a pseudostalk); 7- N/A (no polyp); 8- Excised/snared with no further description; 9- Polyp not removed |
| <b>Interval Colorectal Cancer Variables</b> |                                                                                                                                                                                                                                                                                                                                         |
| <b>Pathology</b>                            | 1- Adenocarcinoma; 2- Adenosquamous carcinoma; 3- Spindle cell carcinoma; 4- Squamous cell (epidermoid) carcinoma; 5- Undifferentiated carcinoma; 6- Other (neuroendocrine, lymphoma, mesenchymal, etc.); 8- N/A (No CRC); 9- Not stated                                                                                                |
| <b>Location</b>                             | 1- Cecum; 2- Ascending; 3- Hepatic flexure; 4- Transverse; 5- Splenic flexure; 6- Descending colon; 7- Sigmoid; 8- Rectosigmoid; 9- Rectum; 10- N/A (No CRC); 11- Not stated; 12- Multiple cancers; 13- liver met                                                                                                                       |
| <b>Stage</b>                                | 1- Stage 1; 2- Stage 2; 3- Stage 3; 4- Stage 4; 8; N/A (No CRC); 9- Not stated                                                                                                                                                                                                                                                          |
